# Supplementary material
Source: PubMed Central journal article supplement (PMC1174978)

# Human chromosome 12

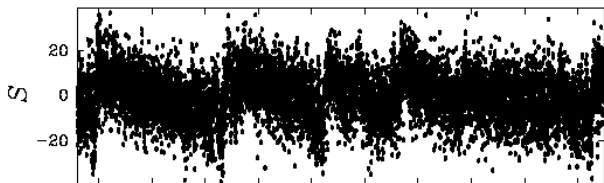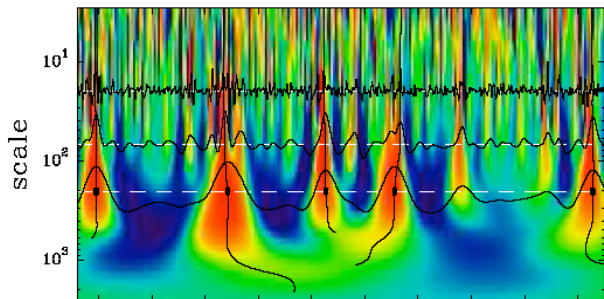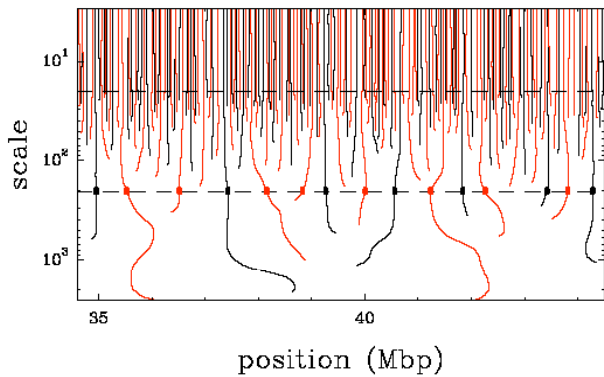

Supplement: pnas_0500577102_1.pdf [file pnas_0500577102_1.pdf]
